# Supplementary material
Source: MDPI journal article supplement (https://www.mdpi.com/2297-8739/9/10/298)
Supplement: s1 [file s1 › separations-1952212-supplementary.pdf]

# In Vitro Cytotoxicity and Spectral Analysis-Based Phytochemical Profiling of Methanol Extract of *Barleria hochstetteri*, and Molecular Mechanisms Underlying Its Apoptosis-Inducing Effect on Breast and Lung Cancer Cell Lines

Chromatogram showing detector response (Y-axis, 0 to 2,429,338) versus time (X-axis, 7.0 to 49.0 min). The plot displays several peaks, with the following retention times labeled:

- 17.181
- 22.432
- 28.406
- 31.759
- 31.983
- 32.192
- 43.234
- 44.960
- 46.883

The label "TIC\*1.00" is present at the bottom right of the plot area.

[www.mdpi.com/journal/separations](http://www.mdpi.com/journal/separations)

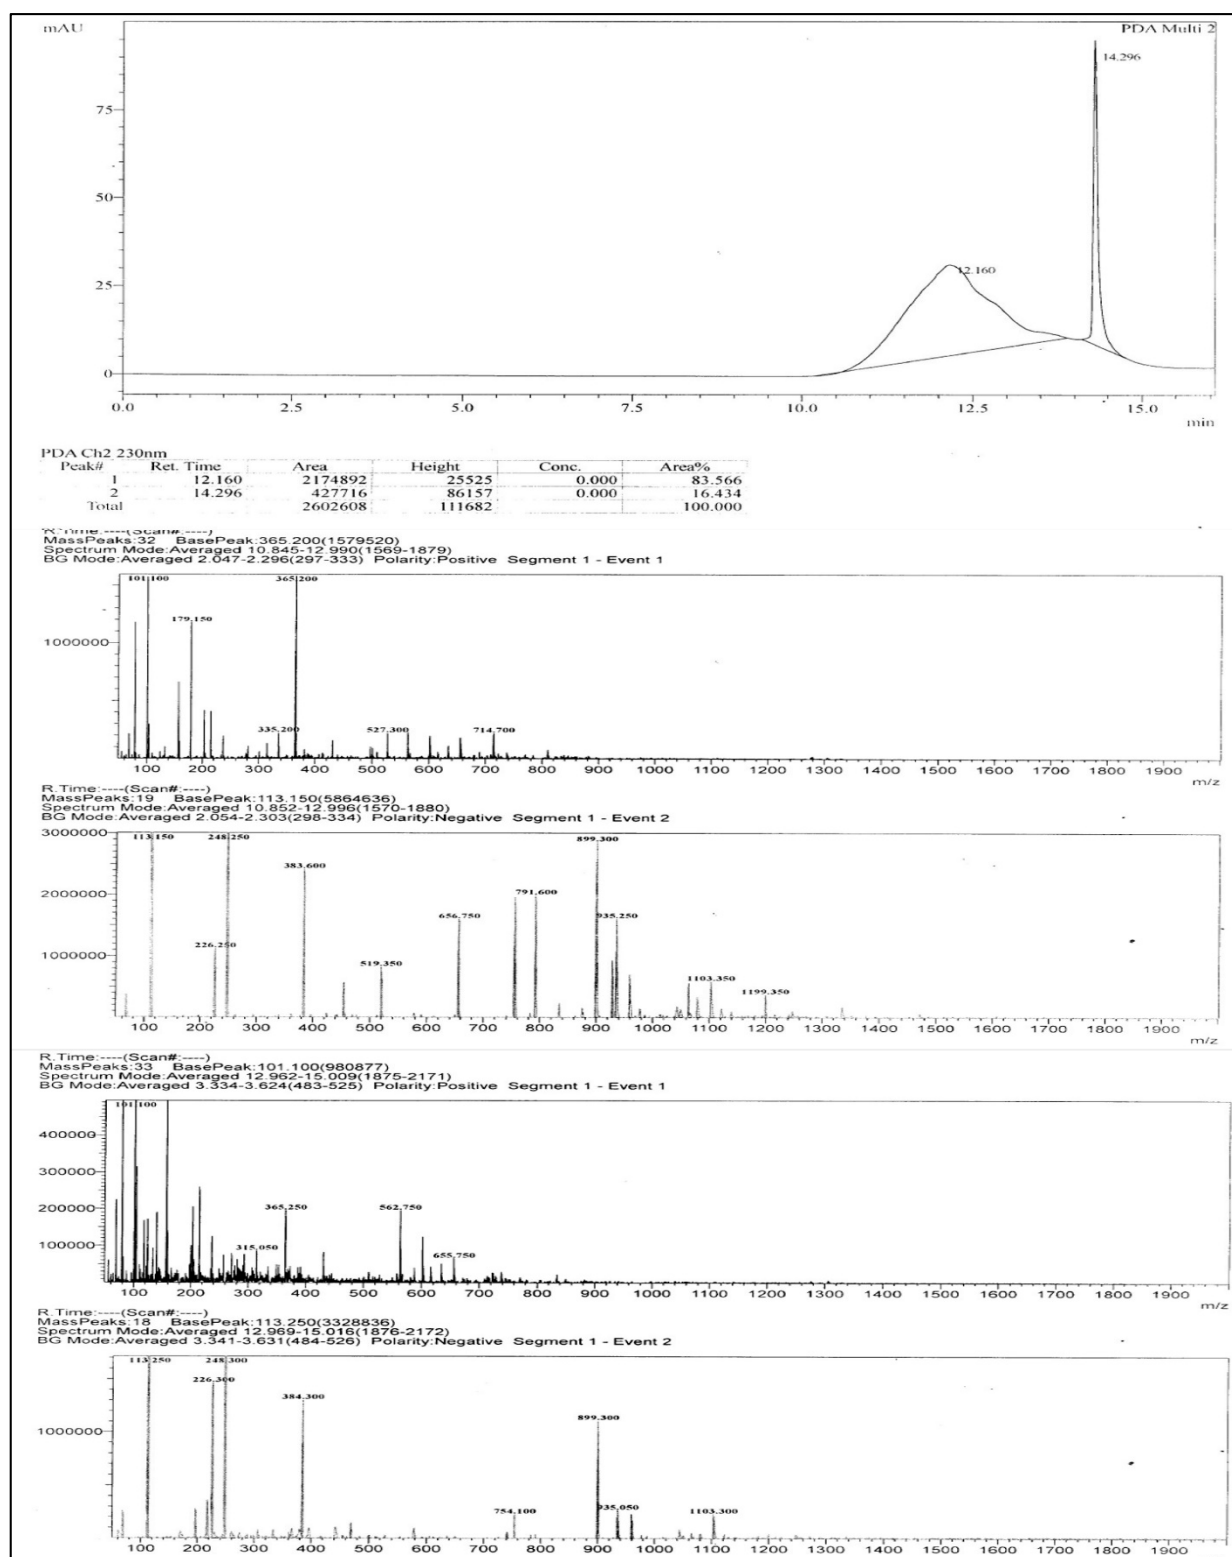

Figure S2. LC-MS analysis peaks of Methanol extract of *B. hochstetteri*.

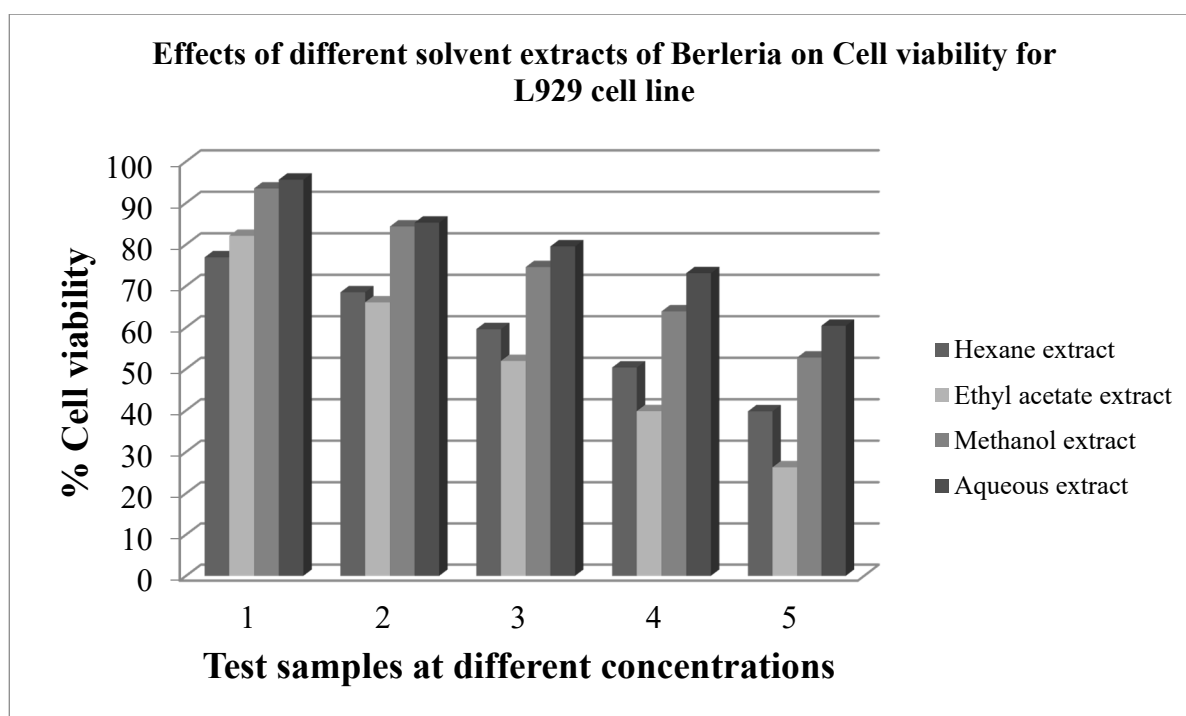

**Figure S3.** Cytotoxicity of different solvent extracts of *B. hochstetteri* against non-cancerous transformed fibroblast L929 cell line.

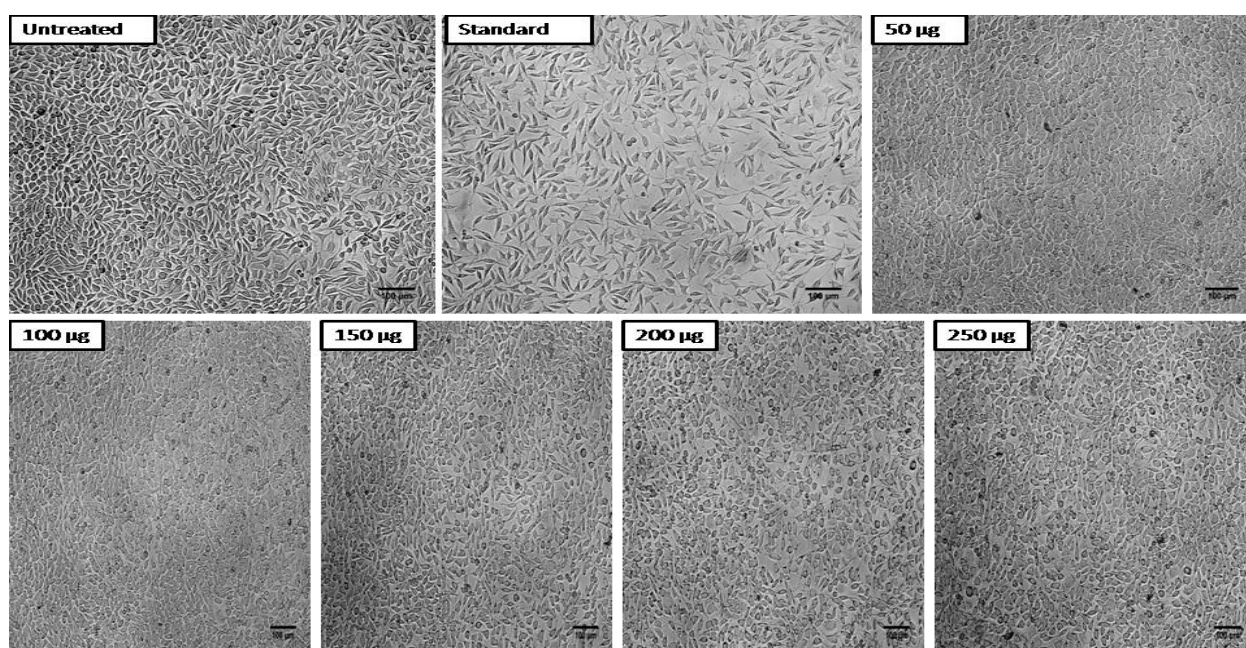

**Figure S4.** Morphological effects of Hexane extract of *B. hochstetteri* on non-cancerous transformed fibroblast L929 cell line.

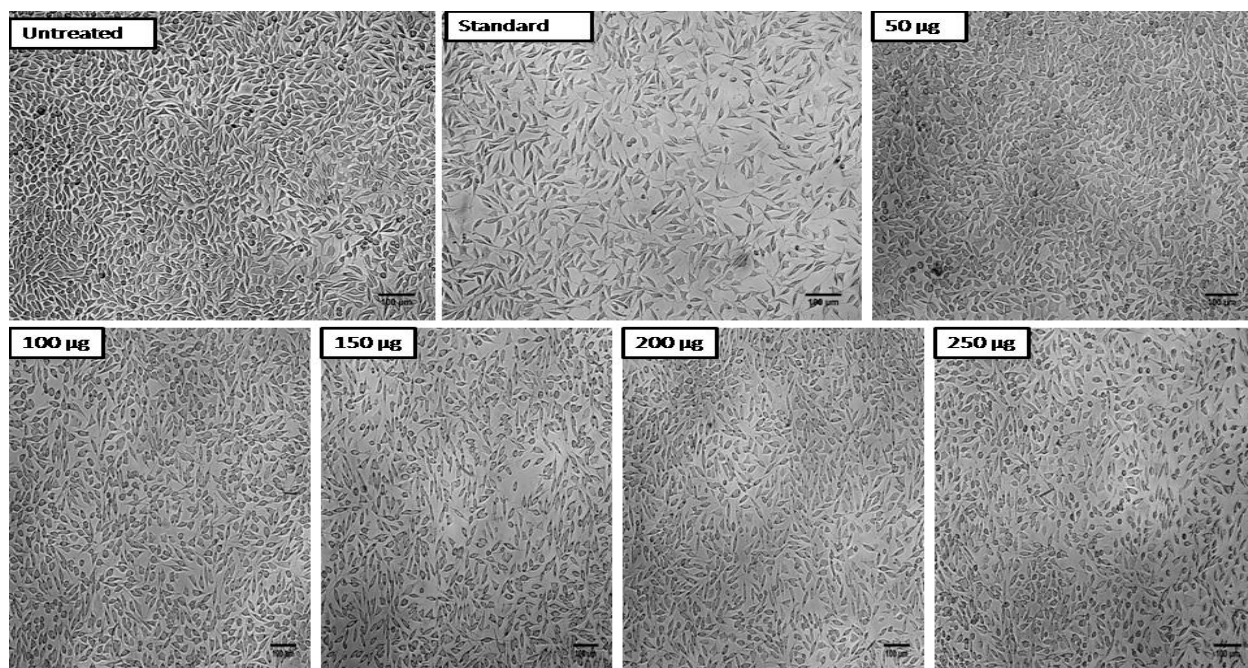

**Figure S5.** Morphological effects of Ethyl acetate extract of *B. hochstetteri* on non-cancerous transformed fibroblast L929 cell line.

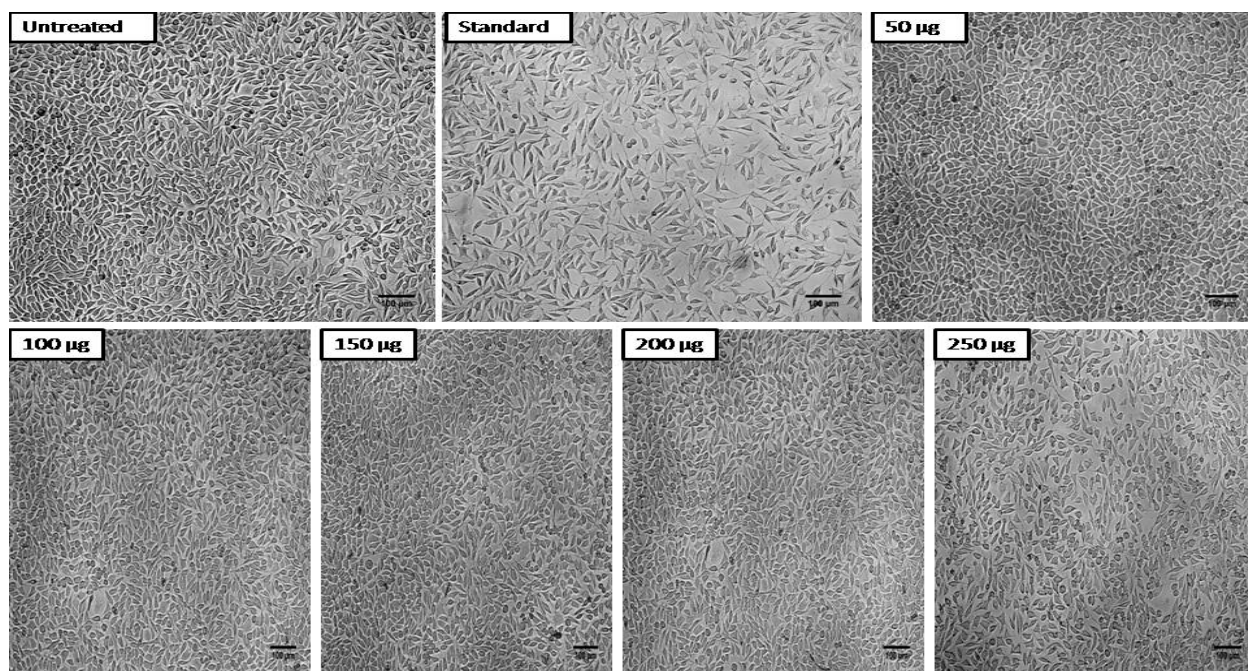

**Figure S6.** Morphological effects of Methanol extract of *B. hochstetteri* on non-cancerous transformed fibroblast L929 cell line.

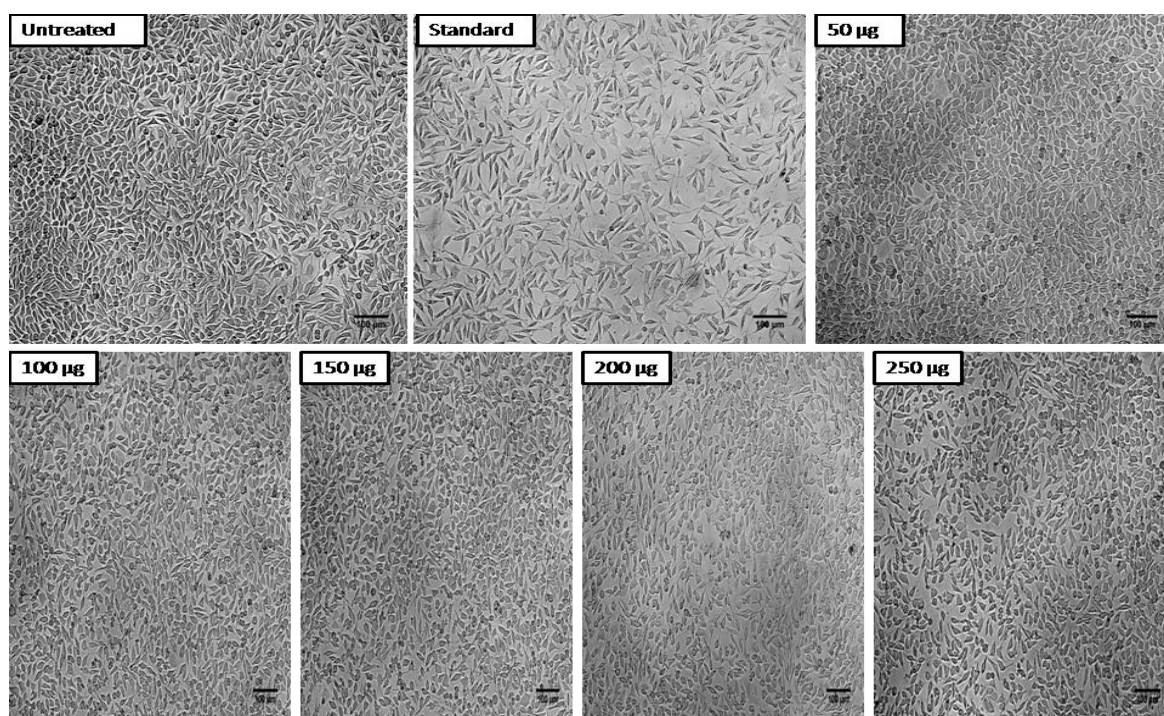

**Figure S7.** Morphological effects of aqueous extract of *B. hochstetteri* on non-cancerous transformed fibroblast L929 cell line.

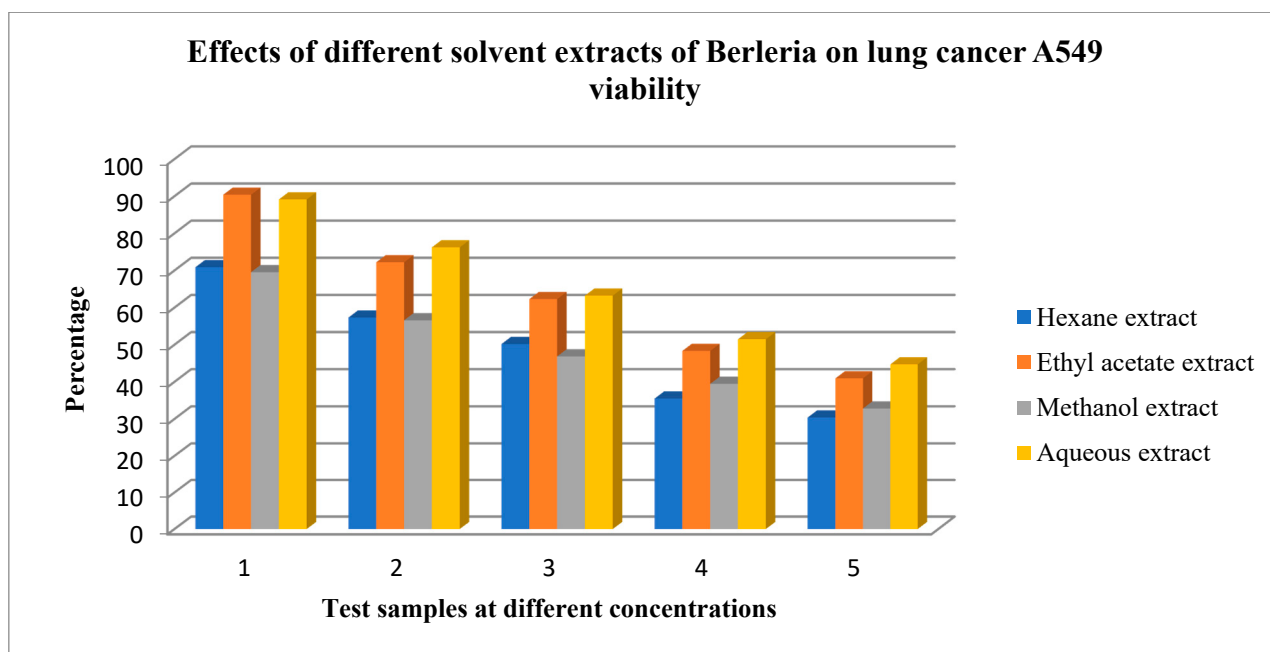

**Figure S8.** Cytotoxic activity of different solvent extracts of *B. hochstetteri* against Lung cancer A549 cell line.

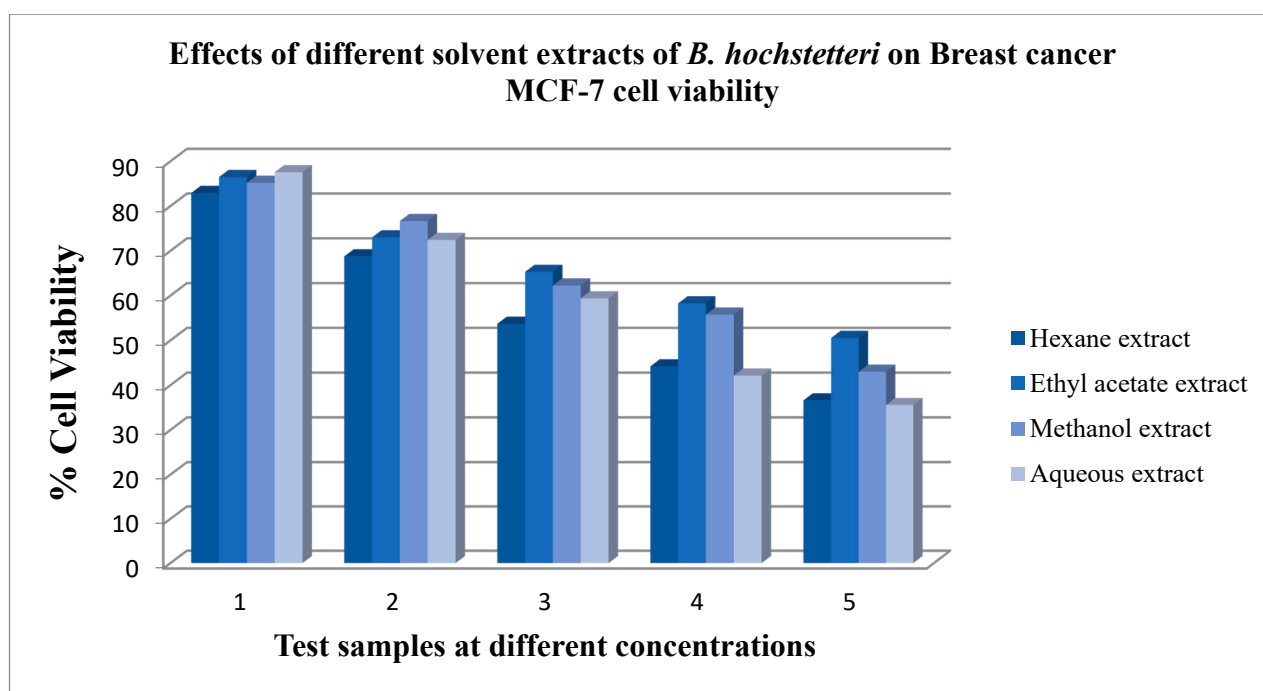

**Figure S9.** Cytotoxic activity of different solvent extracts of *B. hochstetteri* against Breast cancer MCF-7 cell line.

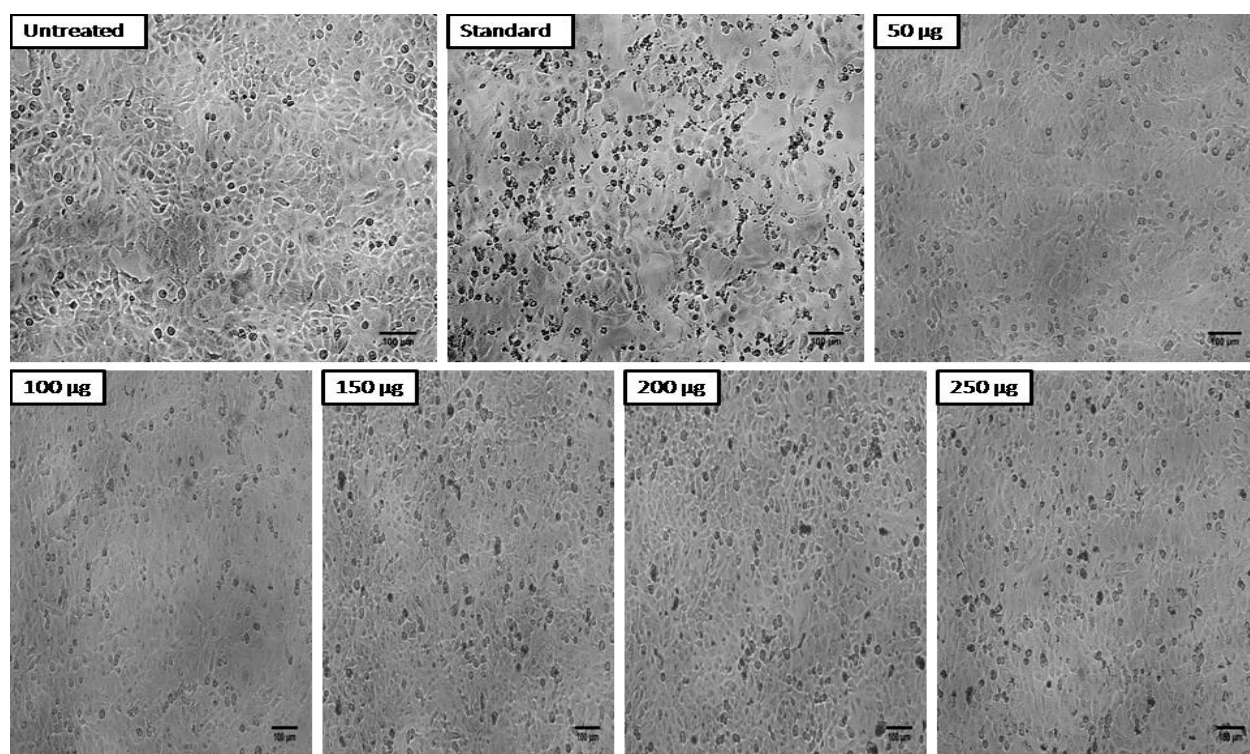

**Figure S10.** Morphological effects of Hexane extract of *B. hochstetteri* on Lung cancer A549 cell line.

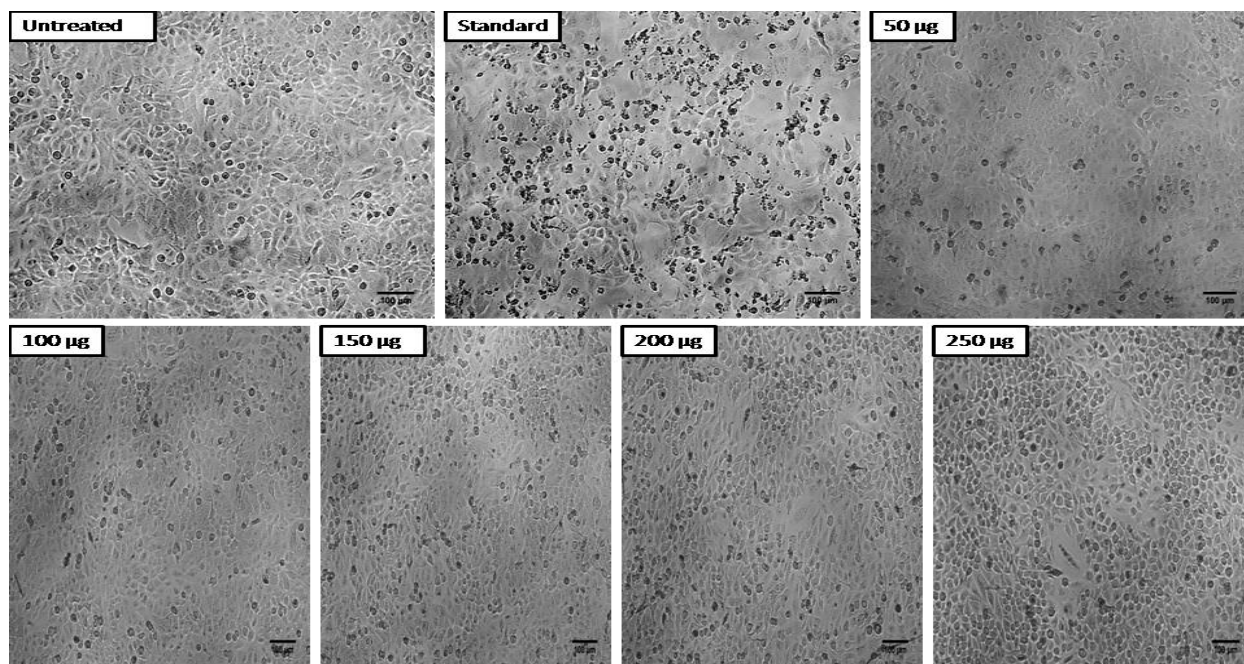

**Figure S11.** Morphological effects of Ethyl acetate extract of *B. hochstetteri* on Lung cancer A549 cell line.

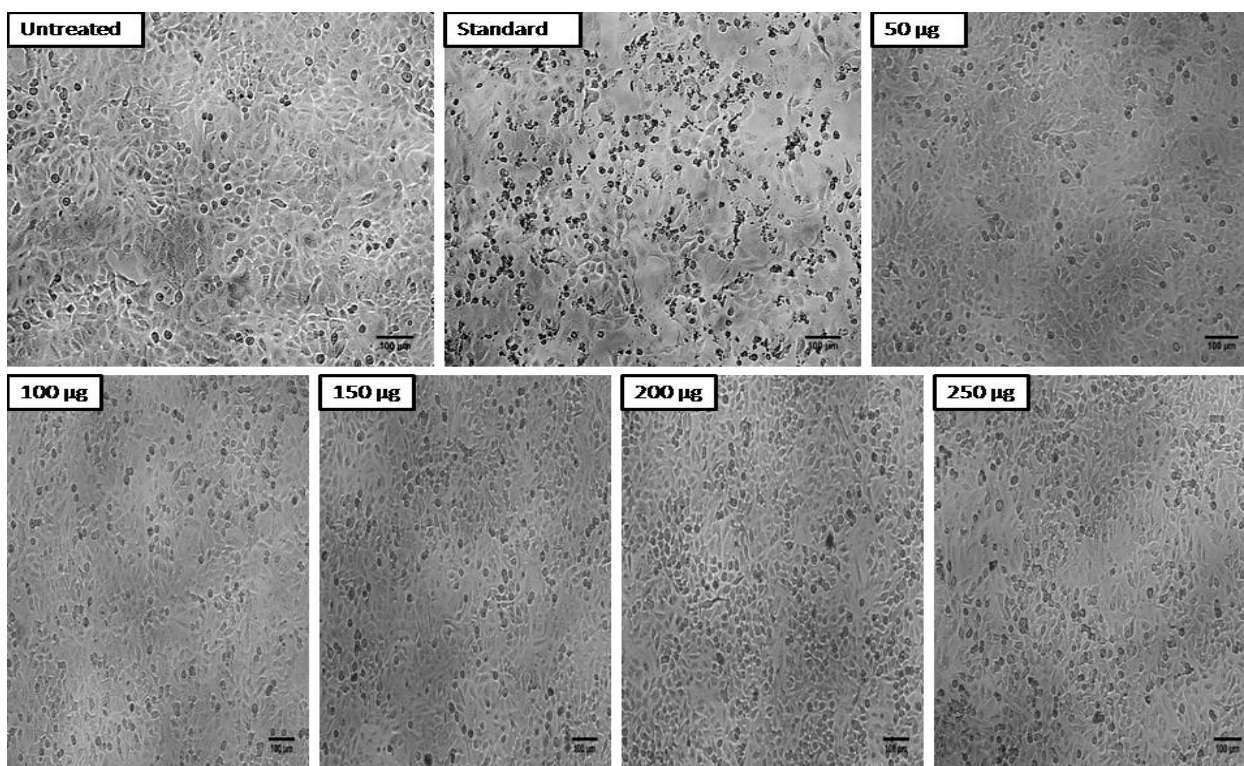

**Figure S12.** Morphological effects of Methanol extract of *B. hochstetteri* on Lung cancer A549 cell line.

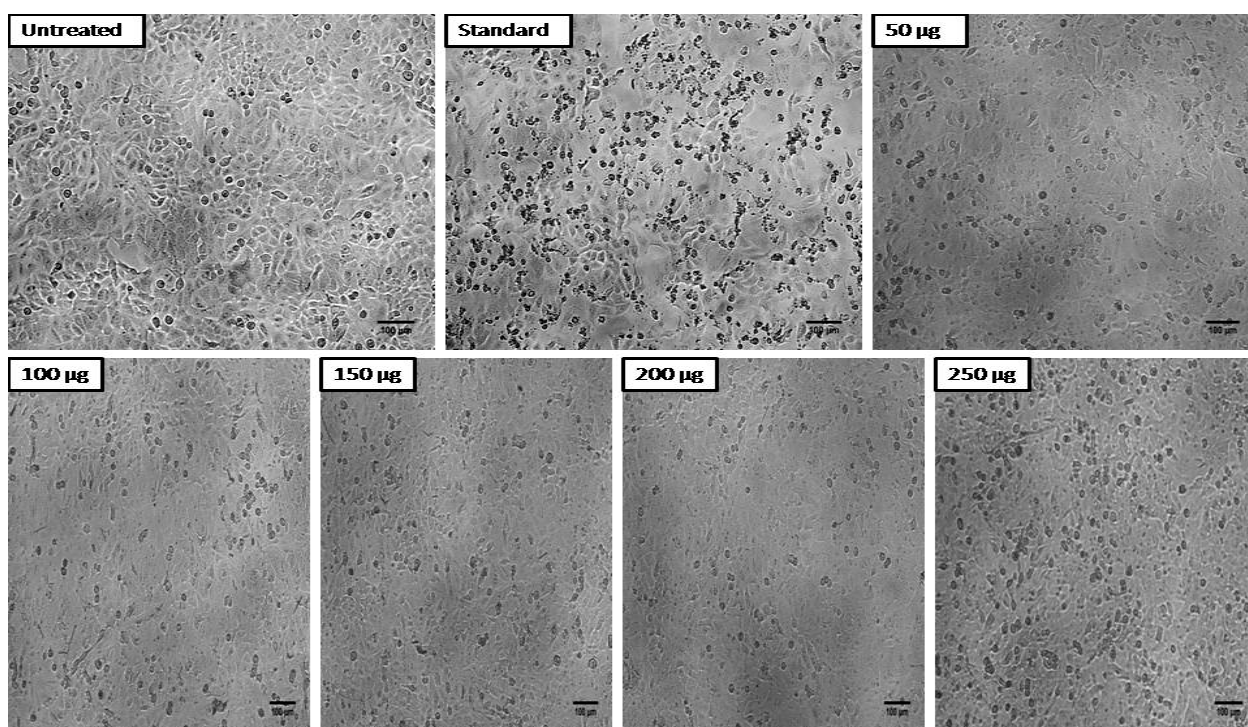

Figure S13. Morphological effects of Aqueous extract of *B. hochstetteri* on Lung cancer A549 cell line.

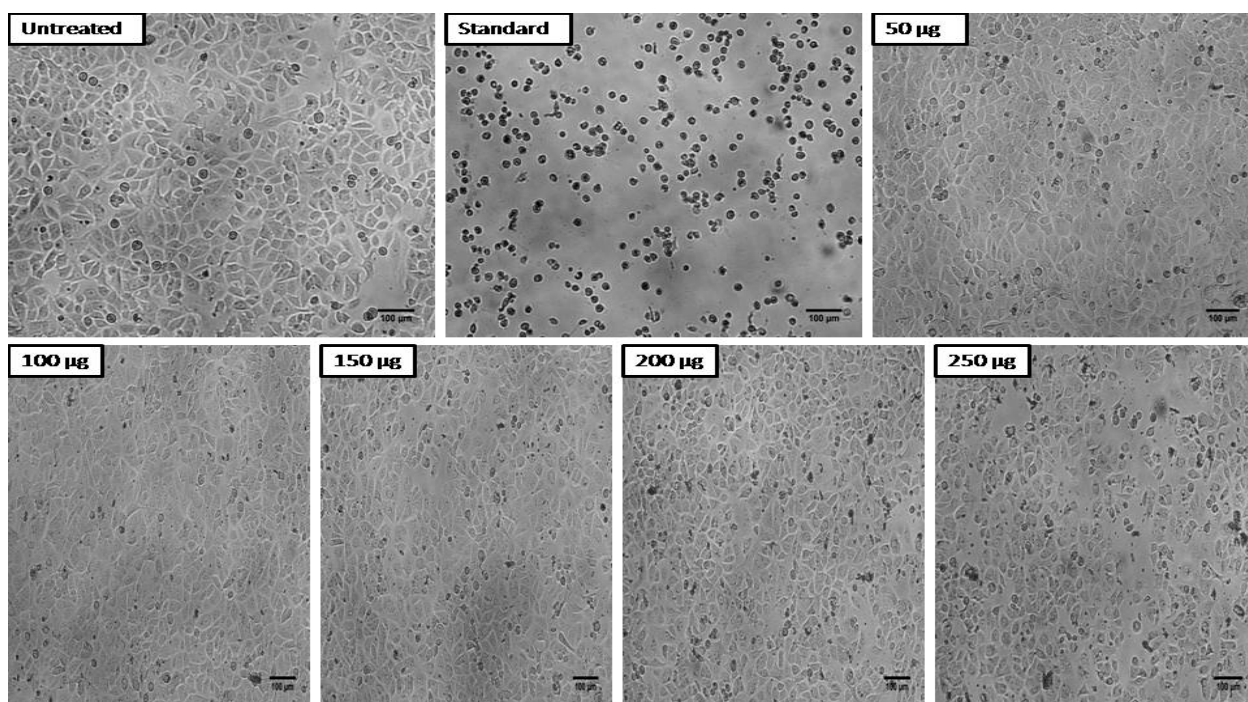

Figure S14. Morphological effects of Hexane extract of *B. hochstetteri* on Breast cancer MCF-7 cell line.

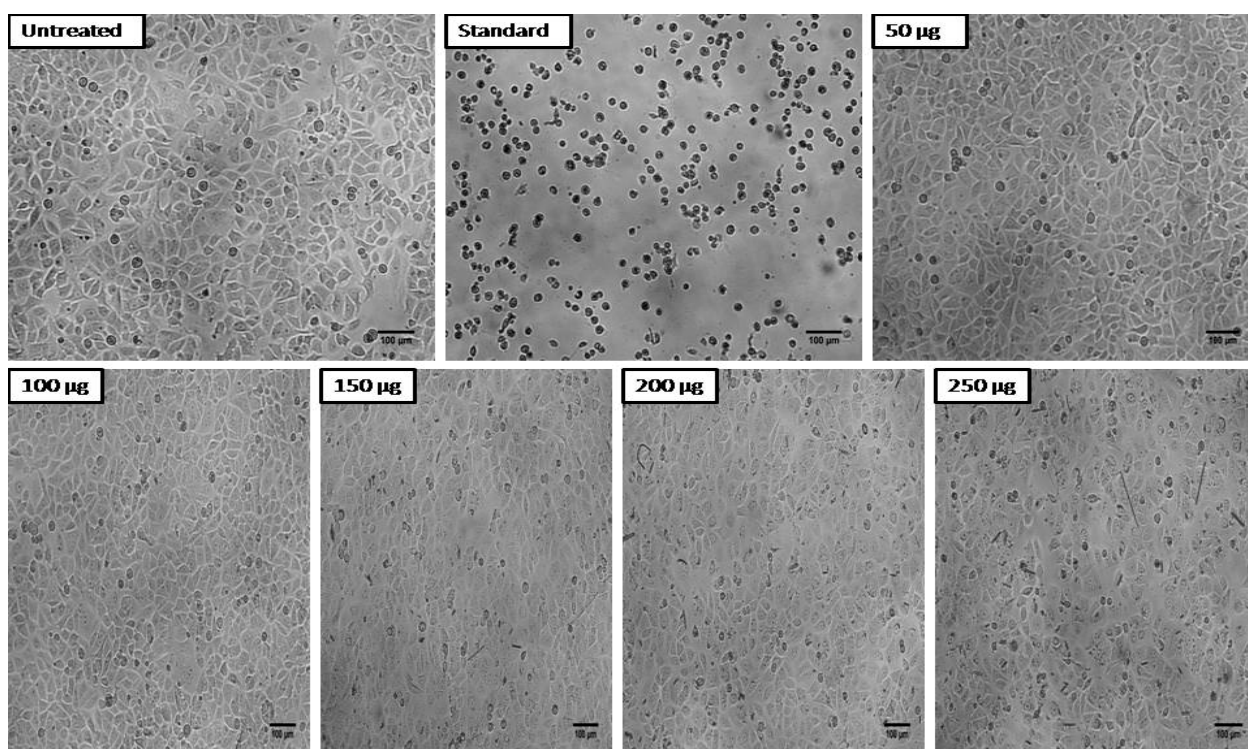

**Figure S15.** Morphological effects of Ethyl acetate extract of *B. hochstetteri* on Breast cancer MCF-7 cell line.

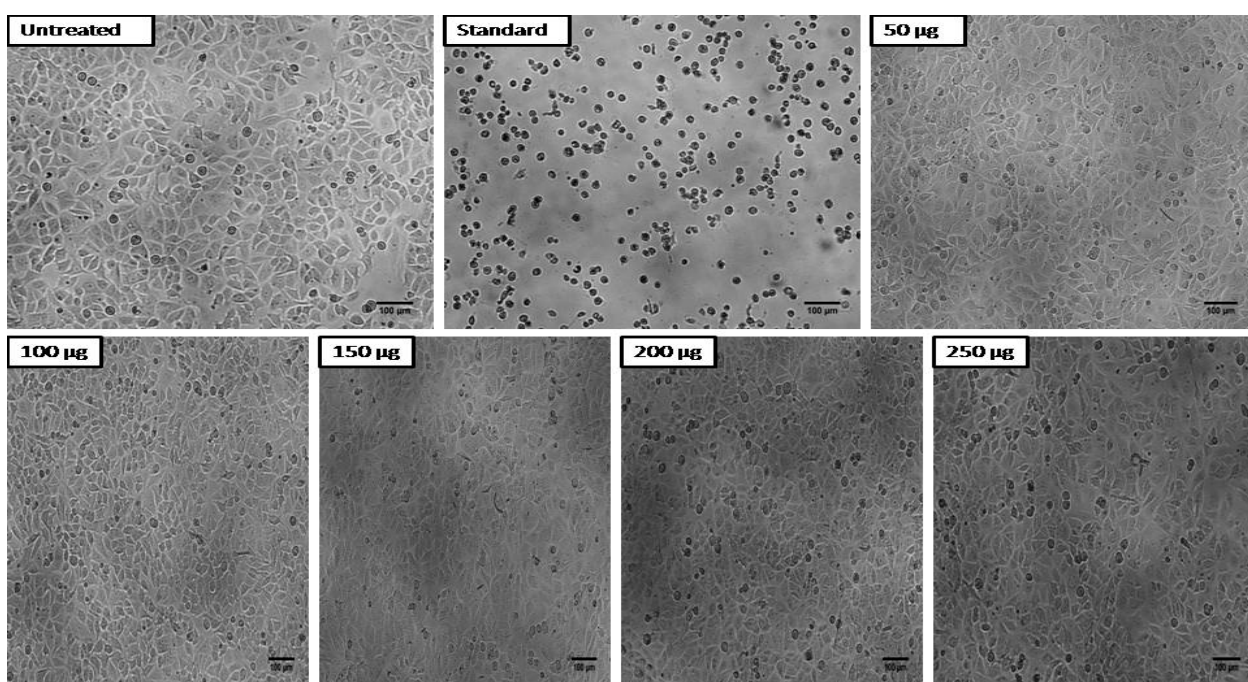

**Figure S16.** Morphological effects of Methanol extract of *B. hochstetteri* on Breast cancer MCF-7 cell line.

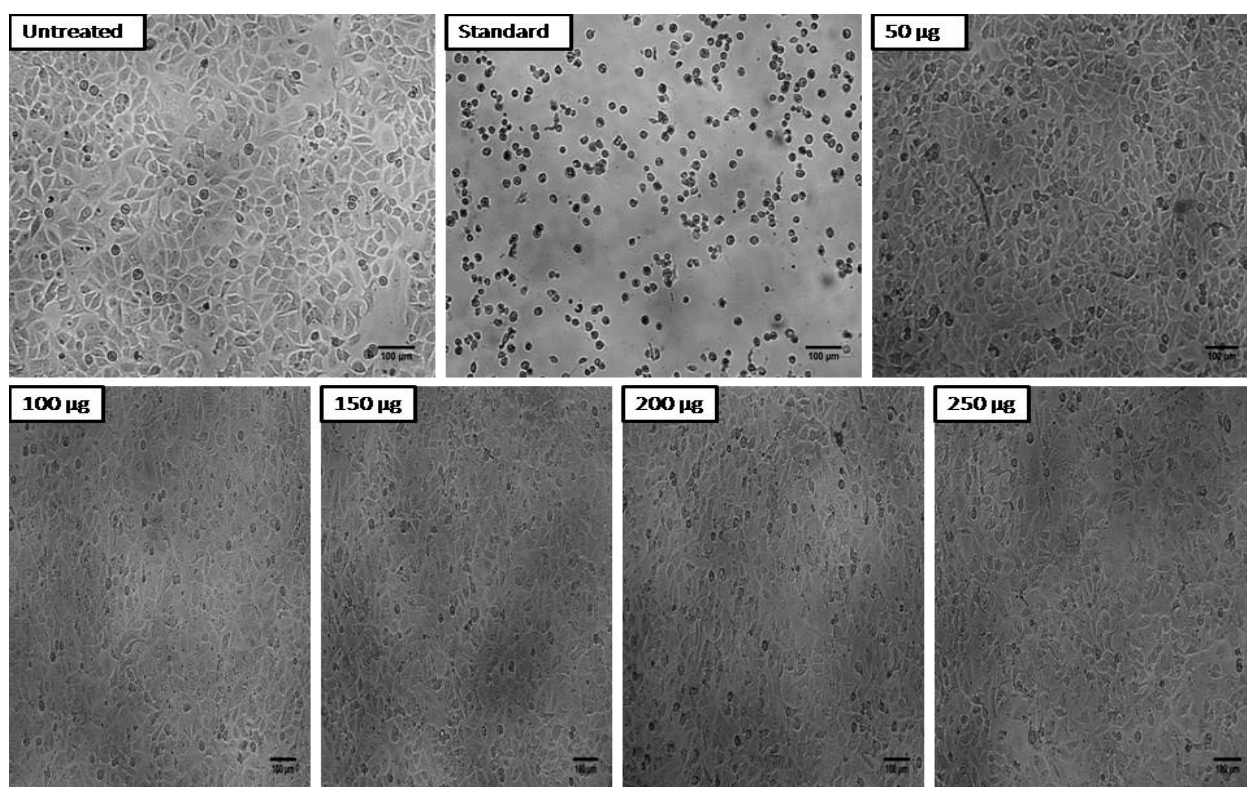

**Figure S17.** Morphological effects of Aqueous extract of *B. hochstetteri* on Breast cancer MCF-7 cell line.
